1 **Bacteremia and Blood Culture Utilization During COVID-19 Surge in New York City**

2  
3 Jorge Sepulveda, MD, PhD<sup>1</sup>, Lars F. Westblade, PhD<sup>2,3</sup>, Susan Whittier, PhD<sup>1</sup>, Michael J. Satlin, MD<sup>3</sup>,  
4 William G. Greendyke, MD<sup>4</sup>, Justin G. Aaron, MD<sup>4</sup>, Jason Zucker, MD<sup>4</sup>, Donald Dietz, MD<sup>4</sup>, Magdalena  
5 Sobieszczyk, MD<sup>4</sup>, Justin J. Choi, MD<sup>3</sup>, Dakai Liu, PhD<sup>5</sup>, Kelvin Espinal, BA<sup>6</sup>, Sarah Russell, BA<sup>6</sup>,  
6 Dennis Camp, BA<sup>6</sup>, Charles Connelly, BS<sup>6</sup>, Daniel A. Green, MD<sup>1, #</sup>

7  
8 <sup>1</sup>Department of Pathology & Cell Biology, Columbia University Irving Medical Center, New York, NY

9 <sup>2</sup>Department of Pathology and Laboratory Medicine, Weill Cornell Medicine, New York, NY

10 <sup>3</sup>Division of Infectious Diseases, Department of Internal Medicine, Weill Cornell Medicine, New York,  
11 NY

12 <sup>4</sup>Division of Infectious Diseases, Department of Internal Medicine, Columbia University Irving Medical  
13 Center, New York, NY

14 <sup>5</sup>Department of Pathology and Clinical Laboratories, NewYork-Presbyterian Queens Hospital

15 <sup>6</sup>Clinical Laboratories, NewYork-Presbyterian Hospital, New York, NY

16

17 Keywords: COVID-19, SARS-CoV-2, Bacteremia, Sepsis, Blood Culture

18 Running Title: Blood Culture COVID-19

19

20 #Address correspondence to:

21 Daniel A. Green, M.D.

22 3959 Broadway

23 Microbiology, CHONY C-324

24 New York, NY 10032

25 (212)-305-6301

26 dag2149@cumc.columbia.edu

27 **Abstract:**

28 A surge of patients with coronavirus disease 2019 (COVID-19) presenting to New York City hospitals in  
29 March 2020 led to a sharp increase in the utilization of blood cultures, which overwhelmed the capacity  
30 of automated blood culture instruments. We sought to evaluate the utilization and diagnostic yield of  
31 blood cultures during the COVID-19 pandemic to determine prevalence and common etiologies of  
32 bacteremia, and to inform a diagnostic approach to relieve blood culture overutilization. We performed a  
33 retrospective cohort analysis of 88,201 blood cultures from 28,011 patients at a multicenter network of  
34 hospitals within New York City to evaluate order volume, positivity rate, time to positivity, and etiologies  
35 of positive cultures in COVID-19. Ordering volume increased by 34.8% in the second half of March 2020  
36 compared to the first half of the month. The rate of bacteremia was significantly lower among COVID-19  
37 patients (3.8%) than COVID-19 negative patients (8.0%) and those not tested (7.1%),  $p < 0.001$ .  
38 COVID-19 patients had a high proportion of organisms reflective of commensal skin microbiota,  
39 reducing the bacteremia rate to 1.6% when excluded. More than 98% of all positive cultures were  
40 detected within 4 days of incubation. Bloodstream infections are very rare for COVID-19 patients, which  
41 supports the judicious use of blood cultures in the absence of compelling evidence for bacterial co-  
42 infection. Clear communication with ordering providers is necessary to prevent overutilization of blood  
43 cultures during COVID-19 surges, and laboratories should consider shortening the incubation period from  
44 5 days to 4 days to free additional capacity.

45

46

47

48

49

50

51

52

53 **Introduction:**

54

55         The rapid spread of severe acute respiratory syndrome coronavirus 2 (SARS-CoV-2) across New  
56 York City in March 2020 led to an unprecedented strain on hospital resources, including shortages of  
57 beds, ventilators, personal protective equipment, and diagnostic materials such as laboratory reagents and  
58 nasopharyngeal swabs<sup>1-3</sup>. The surge of febrile patients to our network of hospitals in New York City led  
59 to a sudden and dramatic increase in the number of blood cultures received in our laboratories, which  
60 overwhelmed the capacity of our automated blood culture instruments.

61         While blood cultures are an essential tool for the diagnosis and management of bloodstream  
62 infections among patients presenting to the emergency department and among inpatients, data are lacking  
63 on their utility for patients with suspected or confirmed coronavirus disease 19 (COVID-19). While many  
64 patients with severe COVID-19 are treated with empiric antibiotics for potential bacterial co-infections,  
65 the rate of bacteremia among these patients is unknown, and the benefit of empiric antibiotic therapy is  
66 unproven. Frequent ordering of blood cultures for patients with COVID-19 may overwhelm a laboratory's  
67 capacity to perform and result these tests, which may negatively impact the overall benefit of testing for  
68 the entire medical center. Therefore, we sought to evaluate both the utilization and diagnostic yield of  
69 blood cultures during a surge of COVID-19 patients presenting to our hospitals, including positivity rates  
70 for patients with and without COVID-19, as well as the most common causes of bacteremia among  
71 COVID-19 patients. We also relay strategies for diagnostic stewardship to mitigate challenges that may  
72 arise from a surge of blood culture orders.

73

74 **Methods:**

75

76 *Study Design:*

77

78 A retrospective cohort study was conducted on patients with blood cultures performed at  
79 NewYork-Presbyterian Hospitals located throughout New York City from January 1, 2020 to March 31,  
80 2020. Corresponding data from January 1, 2019 to March 31, 2019 were collected to establish a seasonal  
81 historic baseline of blood culture ordering and positivity. Records were extracted from the laboratory  
82 information system (Cerner Millennium, Cerner, North Kansas City, MO) using a Cerner Command  
83 Language query and included information on performing facility, SARS-CoV-2 reverse transcription-  
84 polymerase chain reaction (RT-PCR) result, blood culture result, organism(s) identified, and blood culture  
85 collection date and time. After the study period concluded, the blood culture incubation period was  
86 reduced from 5 days to 4 days to free additional space on the instruments. In a subset of patients for  
87 whom data were available, the interval from time of blood culture collection to time of Gram stain was  
88 used to calculate the time to blood culture positivity during the study period, which was used to examine  
89 the predicted effect of this intervention.

90

#### 91 *Laboratory Methods:*

92

93 Blood cultures were incubated on BACTEC FX (Becton, Dickinson and Co., Franklin Lakes, NJ)  
94 or VersaTrek (Thermo Fisher Scientific, Inc., Waltham, MA) instruments for a maximum of 5 days.  
95 SARS-CoV-2 RT-PCR testing was performed in-house with the following assays: cobas SARS-CoV-2  
96 (Roche Molecular Systems, Inc., Branchburg, NJ), Xpert Xpress SARS-CoV-2 (Cepheid, Sunnyvale,  
97 CA), RealStar SARS-CoV-2 (Altona Diagnostics USA, Inc., Plain City, OH), and a laboratory-developed  
98 test developed by the Wadsworth Center at the New York State Department of Health.

99

#### 100 *Participants:*

101

102 A total of 88,201 blood cultures from 28,011 patients were included from the following hospitals  
103 within the NewYork-Presbyterian network: Columbia University Irving Medical Center (32,788), Weill-

104 Cornell Medical Center (26,794), Allen Hospital (6,053), Queens Hospital (16,913), and Lower  
105 Manhattan Hospital (5,653). Patients were stratified by SARS-CoV-2 RT-PCR result as positive,  
106 negative, or not tested. For the purposes of classifying blood cultures by SARS-CoV-2 RT-PCR status,  
107 we used the following criteria:

108 1. Blood cultures were labeled as SARS-CoV-2 status “Positive” if the blood culture was  
109 performed within 2 days of a positive SARS-CoV-2 RT-PCR result and for all subsequent blood  
110 cultures after a positive SARS-CoV-2 RT-PCR result.

111 2. Blood cultures were labeled as SARS-CoV-2 status “Negative” if the blood culture was  
112 performed within 2 days of a negative SARS-CoV-2 RT-PCR result and for all subsequent blood  
113 cultures, unless the patient had a subsequent positive SARS-CoV-2 RT-PCR result, for which the  
114 status was changed to “Positive” for any blood cultures performed within 2 days of the positive  
115 SARS-CoV-2 RT-PCR result.

116 3. All other blood cultures were labeled as SARS-CoV-2 status “Not tested.”

117 The 2-day interval was used to account for turnaround time from test ordering to SARS-CoV-2 test  
118 results, as blood culture and SARS-CoV-2 RT-PCR tests ordered on the same day may have taken up to 2  
119 days for the SARS-CoV-2 RT-PCR result to become available.

120

121 This study was approved by the Institutional Review Boards of Columbia University Irving Medical  
122 Center and Weill-Cornell Medicine.

123

124 *Data Analysis:*

125 All data analysis was performed with the R statistical language version 3.6.3 (*R Core Team*  
126 (2020). *R: A language and environment for statistical computing*. R Foundation for Statistical  
127 Computing, Vienna, Austria. URL <https://www.R-project.org>). Blood culture volumes and positivity rates  
128 were calculated and graphed by day, with a moving regression line estimated by the default *geom\_smooth*  
129 function of the *ggplot2* R package version 3.3.0, namely locally estimated scatterplot smoothing (LOESS)

130 for data with less than 1000 points and generalized additive model (GAM) for data with more than 1000  
131 points. The regression lines were overlaid in the scatterplot to analyze directional trends.

132 Volumes and positivity rates were also stratified by SARS-CoV-2 RT-PCR result using the rules  
133 specified above, and by various patient categories. Bacterial and fungal etiologies of blood cultures were  
134 also collected and stratified by SARS-CoV-2 RT-PCR result. Differences in continuous data between  
135 groups were assessed by one-way analysis of variation (ANOVA), whereas categorical data were  
136 analyzed by Pearson's chi-squared analysis. Categorical data were graphed by the *assoc* function of the  
137 *vcd* R package (version 1.4.7) and colored according to Pearson's residuals to demonstrate sources of  
138 difference between observed and expected proportions in different groups.

139

## 140 **Results:**

141

### 142 *Blood Culture Volumes and Positivity Rate:*

143

144 During the study period, blood culture volumes rose substantially during the month of March  
145 2020 (**Figure 1**). Overall, 8,784 blood cultures were performed during the second half of March 2020,  
146 representing a 34.8% increase from the first half of the month. Patients who were positive for SARS-  
147 CoV-2 accounted for the majority of the increased blood culture ordering. Notably, the increased ordering  
148 among COVID-19 patients was not primarily attributable to repeated ordering, as 48.2% of COVID-19  
149 patients had more than 2 blood culture sets drawn, compared to 66.2% of COVID-19 negative patients  
150 and 62.1% of patients not tested for SARS-CoV-2 ( $p < 0.001$ , **Supplemental Tables 1 and 2**)

151 The blood culture positivity rate was significantly lower for patients that tested positive for  
152 SARS-CoV-2 (3.8%) than for patients that tested negative for SARS-CoV-2 (8.0%) or for patients that  
153 were not tested (7.1%,  $p < 0.001$ , **Table 1**). As additional COVID-19 patients presented to the hospital  
154 throughout the month of March 2020, the overall rate of blood culture positivity continued to decrease  
155 further (**Figure 2**).

156

157 *Etiologies of Bacteremia:*

158

159         Among patients with positive blood cultures, COVID-19 patients had a significantly higher  
160 proportion of cultures that likely represented contamination with normal skin microbiota than all other  
161 groups (**Figure 3 and Table 2**). Organisms were labeled as likely contaminants if they were isolated only  
162 once per patient and belonged to groups generally defined as commensal skin microbiota.<sup>4</sup> Coagulase-  
163 negative *Staphylococcus* species accounted for 59.7% of all positive cultures among COVID-19 patients,  
164 compared to 32.0% among patients that tested negative for SARS-CoV-2, and 29.8% among patients that  
165 were not tested for SARS-CoV-2 in 2020 ( $p < 0.001$ ). *Corynebacterium* species, *Bacillus* species, and  
166 *Micrococcus* species were also seen more frequently among COVID-19 patients (**Supplemental Table**  
167 **3**). When potential contaminants were excluded, the rate of bacteremia for COVID-19 patients decreased  
168 to 1.6%, which was significantly lower than the rate of bacteremia excluding contaminants among  
169 COVID-19 negative patients (5.9%) and during the same period in 2019 (5.7%,  $p < 0.001$ , **Table 3**). The  
170 most common causes of true bacteremia among COVID-19 patients were *Escherichia coli* (16.7%),  
171 *Staphylococcus aureus* (13.3%), *Klebsiella pneumoniae* (10.0%), and *Enterobacter cloacae* complex  
172 (8.3%) (**Supplemental Table 3**). None of these pathogens were overrepresented among COVID-19  
173 patients compared to the other groups.

174

175 *Incubation Period:*

176

177         Among the subset of 1859 positive blood cultures for which incubation period could be reliably  
178 assessed, the vast majority (88.2%) signaled positive within 1-2 days of incubation, with an additional  
179 7.0% signaling positive on day 3 and 3.0% signaling positive on day 4 (**Figure 4 and Supplemental**  
180 **Table 4**). Only 1.8% of all blood cultures signaled positive on day 5, many of which yielded normal skin  
181 microbiota (**Supplemental Table 5**). Among COVID-19 patients, 97.3% of positive cultures signaled

182 positive within 3 days of incubation, with one culture positive on the 4<sup>th</sup> day for *Cutibacterium acnes* and  
183 one culture positive on the 5<sup>th</sup> day for *Candida albicans*.

184

185 **Discussion:**

186

187 Beginning in March 2020, a surge of COVID-19 patients presenting to our network of hospitals  
188 in New York City, the current epicenter of the global COVID-19 pandemic<sup>5</sup>, led to a dramatic increase in  
189 the utilization of blood cultures. In patients presenting with severe febrile illness, blood cultures are  
190 essential in ruling out bacterial infection and guiding appropriate antibiotic utilization. However, we  
191 found a very low rate of bacteremia among patients diagnosed with COVID-19, implying a remarkably  
192 low diagnostic yield of blood cultures for COVID-19 patients. When excluding likely contaminants,  
193 COVID-19 patients had bacteremia rates that were less than one third of the baseline rate from 2019.  
194 These data demonstrate that bloodstream infections appear to be very rare for COVID-19 patients, and  
195 suggest that empiric antibiotics may not be useful in the absence of compelling evidence of an  
196 accompanying bacterial infection. Notably, we did not evaluate other bacterial infections such as bacterial  
197 pneumonia, although other studies have shown low levels of procalcitonin among COVID-19 patients,  
198 arguing that bacterial superinfection may be uncommon<sup>6-8</sup>.

199 As medical centers across the United States prepare for anticipated waves of COVID-19 patients,  
200 our data may be used to justify the judicious utilization of blood cultures to preserve the operational  
201 capacity of diagnostic laboratories and to promote antimicrobial stewardship efforts to reduce  
202 unnecessary antibiotic administration. Overordering of blood cultures during a COVID-19 surge within  
203 our hospital network resulted in culture volumes that exceeded the capacity of our automated instruments,  
204 requiring additional staff to manually process these cultures at a time when staffing and supplies were  
205 already constrained. Our experience should serve as a caution to other medical centers that overordering  
206 of blood cultures during patient surges can overwhelm laboratory capacity and may negatively impact the  
207 quality of results for all patients.



208           As a harm-reduction measure, we decreased the incubation period of blood cultures from 5 days  
209 to 4 days after the study period concluded, which freed additional space to allow for timely processing of  
210 incoming cultures. Our data demonstrate that this intervention likely had little to no adverse effect on  
211 patient care, as all but one COVID-19 patients with positive cultures during the study period signaled  
212 positive within 4 days, and only 1.8% of all positive cultures signaled positive on the 5<sup>th</sup> day, many of  
213 which were positive for normal skin microbiota. Previous studies have also shown that decreasing the  
214 incubation of blood cultures to 4 days<sup>9</sup> or even 3 days<sup>10,11</sup> has minimal effect on positivity rates,  
215 particularly for clinically significant bacteria.

216           To our knowledge, this study is the first to examine blood culture utilization among COVID-19  
217 patients. The inclusion of over 88,000 patient cultures is a major strength of the study design, as is the  
218 multicenter analysis from a wide geographic catchment area in New York City, which increases the  
219 generalizability of our results. Limitations of the study include paucity of data on other bacterial co-  
220 infections and lack of data on patient antibiotic utilization to demonstrate how blood culture utilization  
221 impacted therapy.

222           In summary, we observed an overutilization of blood cultures during a surge of COVID-19  
223 patients to our network of medical centers in New York City and found a very low rate of bloodstream  
224 infections among COVID-19 patients. This overutilization was mitigated through a 4 day incubation with  
225 likely minimal impact on patient care. Clear communication with ordering providers and hospital  
226 leadership regarding the low yield of blood cultures is a necessary step to mitigate overordering and to  
227 preserve laboratory functionality during these periods. Laboratories should also consider reducing the  
228 incubation period of blood cultures from 5 days to 4 days to further increase their capacity.

229

### 230 **Acknowledgments:**

231 *Potential conflicts of interest:* J.J.C. has received research support from Roche Diagnostics. All other  
232 authors have no conflicts.

233

234 **References:**

235

- 236 1. Fomsgaard AS, Rosenstjerne MW. An alternative workflow for molecular detection of  
237 SARS-CoV-2 - escape from the NA extraction kit-shortage, Copenhagen, Denmark, March  
238 2020. *Euro Surveill.* 2020;25(14).
- 239 2. Newton PN, Bond KC, signatories from c. COVID-19 and risks to the supply and quality of  
240 tests, drugs, and vaccines. *Lancet Glob Health.* 2020.
- 241 3. Ranney ML, Griffeth V, Jha AK. Critical Supply Shortages - The Need for Ventilators and  
242 Personal Protective Equipment during the Covid-19 Pandemic. *N Engl J Med.* 2020.
- 243 4. Horan TC, Andrus M, Dudeck MA. CDC/NHSN surveillance definition of health care-  
244 associated infection and criteria for specific types of infections in the acute care setting.  
245 *Am J Infect Control.* 2008;36(5):309-332.
- 246 5. New York City Department of Health COVID-19 Data.  
247 <https://www1.nyc.gov/site/doh/covid/covid-19-data.page>. Accessed April 21, 2020.
- 248 6. Guan WJ, Ni ZY, Hu Y, et al. Clinical Characteristics of Coronavirus Disease 2019 in China.  
249 *N Engl J Med.* 2020.
- 250 7. Lippi G, Plebani M. Procalcitonin in patients with severe coronavirus disease 2019  
251 (COVID-19): A meta-analysis. *Clin Chim Acta.* 2020;505:190-191.
- 252 8. Lippi G, Plebani M. Laboratory abnormalities in patients with COVID-2019 infection. *Clin*  
253 *Chem Lab Med.* 2020.

- 254 9. Doern GV, Brueggemann AB, Dunne WM, Jenkins SG, Halstead DC, McLaughlin JC. Four-  
255 day incubation period for blood culture bottles processed with the Difco ESP blood  
256 culture system. *J Clin Microbiol.* 1997;35(5):1290-1292.
- 257 10. Bourbeau PP, Foltzer M. Routine incubation of BacT/ALERT FA and FN blood culture  
258 bottles for more than 3 days may not be necessary. *J Clin Microbiol.* 2005;43(5):2506-  
259 2509.
- 260 11. Bourbeau PP, Pohlman JK. Three days of incubation may be sufficient for routine blood  
261 cultures with BacT/Alert FAN blood culture bottles. *J Clin Microbiol.* 2001;39(6):2079-  
262 2082.
- 263  
264  
265  
266  
267  
268  
269  
270  
271  
272  
273  
274  
275  
276  
277

278 **Tables**

279 **Table 1A** - Distribution of blood culture results by SARS-CoV-2 status

| <b>SARS-CoV-2 Status</b> | Jan-Feb, 2019<br>(N=29019) | Mar 1-15, 2019<br>(N=7601) | Mar 16-31, 2019<br>(N=7688) | Jan-Feb, 2020<br>(N=28593) | Mar 1-15, 2020<br>(N=6518) | Mar 16-31, 2020<br>(N=8784) | Total<br>(N=88203) |
|--------------------------|----------------------------|----------------------------|-----------------------------|----------------------------|----------------------------|-----------------------------|--------------------|
| <b>Not tested</b>        |                            |                            |                             |                            |                            |                             |                    |
| <i>Negative</i>          | 27022<br>(93.1%)           | 7074<br>(93.1%)            | 7065<br>(91.9%)             | 26520<br>(92.7%)           | 5556<br>(93.5%)            | 1779<br>(93.8%)             | 75016<br>(92.9%)   |
| <i>Positive</i>          | 1997<br>(6.9%)             | 527<br>(6.9%)              | 623<br>(8.1%)               | 2073<br>(7.3%)             | 386<br>(6.5%)              | 117<br>(6.2%)               | 5723<br>(7.1%)     |
| <b>Negative</b>          |                            |                            |                             |                            |                            |                             |                    |
| <i>Negative</i>          | 0                          | 0                          | 0                           | 0                          | 431<br>(93.7%)             | 2317<br>(91.7%)             | 2748<br>(92.0%)    |
| <i>Positive</i>          | 0                          | 0                          | 0                           | 0                          | 29 (6.3%)                  | 209<br>(8.3%)               | 238<br>(8.0%)      |
| <b>Positive</b>          |                            |                            |                             |                            |                            |                             |                    |
| <i>Negative</i>          | 0                          | 0                          | 0                           | 0                          | 110<br>(94.8%)             | 4198<br>(96.2%)             | 4308<br>(96.2%)    |
| <i>Positive</i>          | 0                          | 0                          | 0                           | 0                          | 6 (5.2%)                   | 164<br>(3.8%)               | 170<br>(3.8%)      |

280

281 **Table 1B** - Distribution of blood culture results collected in March 2020 by SARS-CoV-2 status.

| Blood Culture Date          | Not tested<br>(N=7838) | Negative<br>(N=2986) | Positive<br>(N=4478) | Total<br>(N=15302) | p value             |
|-----------------------------|------------------------|----------------------|----------------------|--------------------|---------------------|
| Mar 1-15, 2020              |                        |                      |                      |                    | 0.840 <sup>1</sup>  |
| <b>Blood Culture Result</b> |                        |                      |                      |                    |                     |
| <i>Negative</i>             | 5556 (93.5%)           | 431 (93.7%)          | 110 (94.8%)          | 6097<br>(93.5%)    |                     |
| <i>Positive</i>             | 386 (6.5%)             | 29 (6.3%)            | 6 (5.2%)             | 421 (6.5%)         |                     |
| Mar 16-31, 2020             |                        |                      |                      |                    | <0.001 <sup>1</sup> |
| <b>Blood Culture Result</b> |                        |                      |                      |                    |                     |
| <i>Negative</i>             | 1779 (93.8%)           | 2317 (91.7%)         | 4198 (96.2%)         | 8294 (94.4%)       |                     |
| <i>Positive</i>             | 117 (6.2%)             | 209 (8.3%)           | 164 (3.8%)           | 490 (5.6%)         |                     |

282 1. Pearson's Chi-squared test

283

284 **Table 2** - Most frequent microorganism groups isolated from blood cultures by SARS-CoV-2  
 285 status. Each species was counted once per patient, independently of how often it was isolated  
 286 from each patient, then grouped by the conventional categories.

|                                             | Not tested<br>(N=3928) | Negative<br>(N=153) | Positive<br>(N=159) | Total<br>(N=4240) | p value             |
|---------------------------------------------|------------------------|---------------------|---------------------|-------------------|---------------------|
| <b>Microorganism</b>                        |                        |                     |                     |                   | <0.001 <sup>1</sup> |
| <i>Staphylococcus aureus</i>                | 344 (8.8%)             | 15 (9.8%)           | 8 (5.0%)            | 367 (8.7%)        |                     |
| Coagulase-negative<br><i>Staphylococcus</i> | 1169 (29.8%)           | 49 (32.0%)          | 95 (59.7%)          | 1313 (31.0%)      |                     |
| Other Gram-positive cocci                   | 702 (17.9%)            | 25 (16.3%)          | 21 (13.2%)          | 748 (17.6%)       |                     |
| Gram-negative rods                          | 1187 (30.2%)           | 42 (27.5%)          | 16 (10.1%)          | 1245 (29.4%)      |                     |
| Gram-positive rods                          | 236 (6.0%)             | 5 (3.3%)            | 15 (9.4%)           | 256 (6.0%)        |                     |
| Gram-negative cocci                         | 6 (0.2%)               | 0 (0.0%)            | 0 (0.0%)            | 6 (0.1%)          |                     |
| Anaerobes                                   | 171 (4.4%)             | 10 (6.5%)           | 2 (1.3%)            | 183 (4.3%)        |                     |
| Yeast                                       | 113 (2.9%)             | 7 (4.6%)            | 2 (1.3%)            | 122 (2.9%)        |                     |

287 1. Pearson's Chi-squared test

288 **Table 3** - Distribution of blood culture results by date and SARS-CoV-2 Status. Organisms were  
 289 labeled as likely contaminants if they were isolated only once per patient and belong to the  
 290 groups generally defined as skin contaminants

| Blood Culture Date |                    | Not tested (N=80739) | Negative (N=2986) | Positive (N=4478) | Total (N=88203) | p value             |
|--------------------|--------------------|----------------------|-------------------|-------------------|-----------------|---------------------|
| Jan-Feb 2019       | <b>BC Result</b>   |                      |                   |                   |                 |                     |
|                    | Negative           | 27022 (93.1%)        | 0                 | 0                 | 27022 (93.1%)   |                     |
|                    | Likely Contaminant | 636 (2.2%)           | 0                 | 0                 | 636 (2.2%)      |                     |
|                    | Positive           | 1361 (4.7%)          | 0                 | 0                 | 1361 (4.7%)     |                     |
| Mar 1-15, 2019     | <b>BC Result</b>   |                      |                   |                   |                 |                     |
|                    | Negative           | 7074 (93.1%)         | 0                 | 0                 | 7074 (93.1%)    |                     |
|                    | Likely Contaminant | 154 (2.0%)           | 0                 | 0                 | 154 (2.0%)      |                     |
|                    | Positive           | 373 (4.9%)           | 0                 | 0                 | 373 (4.9%)      |                     |
| Mar 16-31, 2019    | <b>BC Result</b>   |                      |                   |                   |                 |                     |
|                    | Negative           | 7065 (91.9%)         | 0                 | 0                 | 7065 (91.9%)    |                     |
|                    | Likely Contaminant | 186 (2.4%)           | 0                 | 0                 | 186 (2.4%)      |                     |
|                    | Positive           | 437 (5.7%)           | 0                 | 0                 | 437 (5.7%)      |                     |
| Jan-Feb 2020       | <b>BC Result</b>   |                      |                   |                   |                 |                     |
|                    | Negative           | 26520 (92.7%)        | 0                 | 0                 | 26520 (92.7%)   |                     |
|                    | Likely Contaminant | 624 (2.2%)           | 0                 | 0                 | 624 (2.2%)      |                     |
|                    | Positive           | 1449 (5.1%)          | 0                 | 0                 | 1449 (5.1%)     |                     |
| Mar 1-15, 2020     | <b>BC Result</b>   |                      |                   |                   |                 | 0.431 <sup>1</sup>  |
|                    | Negative           | 5556 (93.5%)         | 431 (93.7%)       | 110 (94.8%)       | 6097 (93.5%)    |                     |
|                    | Likely Contaminant | 128 (2.2%)           | 7 (1.5%)          | 4 (3.4%)          | 139 (2.1%)      |                     |
|                    | Positive           | 258 (4.3%)           | 22 (4.8%)         | 2 (1.7%)          | 282 (4.3%)      |                     |
| Mar 16-31, 2020    | <b>BC Result</b>   |                      |                   |                   |                 | <0.001 <sup>1</sup> |
|                    | Negative           | 1779 (93.8%)         | 2317 (91.7%)      | 4198 (96.2%)      | 8294 (94.4%)    |                     |
|                    | Likely Contaminant | 31 (1.6%)            | 59 (2.3%)         | 96 (2.2%)         | 186 (2.1%)      |                     |
|                    | Positive           | 86 (4.5%)            | 150 (5.9%)        | 68 (1.6%)         | 304 (3.5%)      |                     |

1. Pearson's Chi-squared test

291  
292

293 **Figure Legends:**

294 Figure 1: Blood culture ordering volume by day in 2019 and 2020. Total blood cultures are shown in  
295 purple and are broken down by SARS-CoV-2 status of “Positive” in blue, “Negative” in red, and “Not  
296 tested” in green.

297

298 Figure 2: Rate of blood culture positivity by day in 2019 and 2020. The percentage of positive blood  
299 cultures is shown in red and the total number of negative blood cultures is shown in blue.

300

301 Figure 3: Frequency of microorganisms identified from positive blood cultures stratified by SARS-CoV-2  
302 status. Each microorganism was counted once per patient and grouped by the categories specified in the  
303 figure legends. A. All microorganisms isolated were counted. B. Likely skin contaminant were excluded.  
304 \*\*\* Pearson’s chi-square p-value < 0.001.

305

306 Figure 4: Time to positivity of positive blood cultures stratified by SARS-CoV-2 status. Time to  
307 positivity was calculated from the time of collection to the first positive signal as recorded by the gram  
308 stain date/time. The scaled density distribution of the time to positivity is shown as color-filled density  
309 plots and the cumulative distribution of positivity over time is represented by solid lines.

310

Figure 1 - Blood Culture Volumes

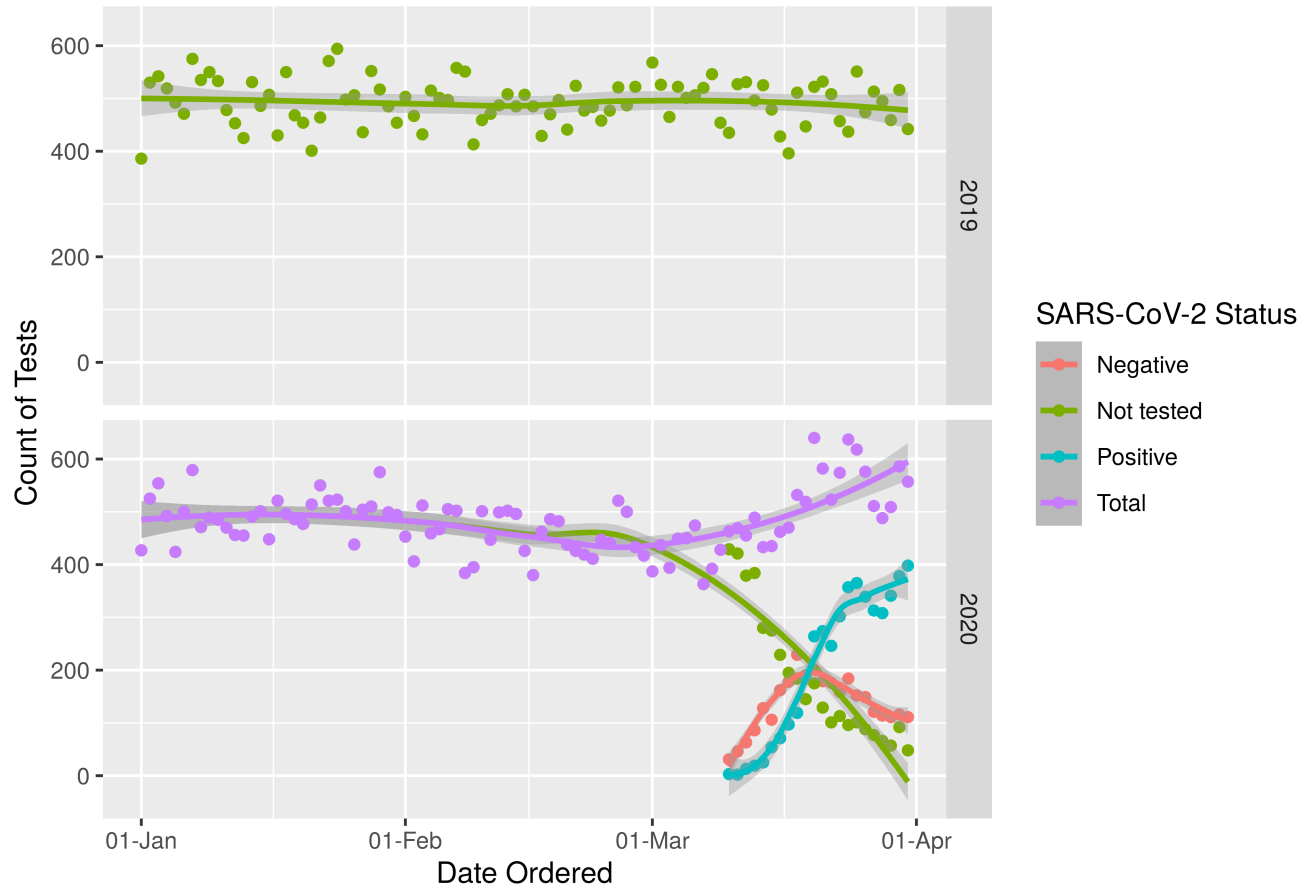



Figure 2 - % Positive Blood Cultures (in red) and Number of Negative Blood Cultures (in blue)

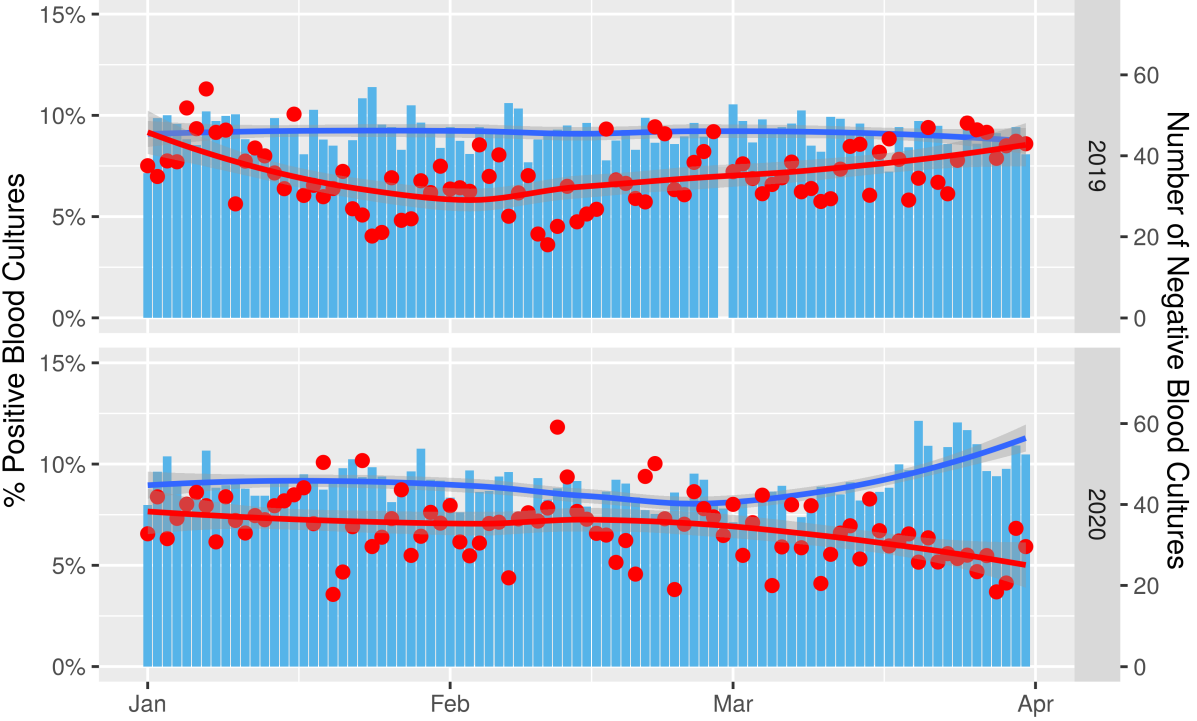

**Figure 3-A. All positive cultures per patient**

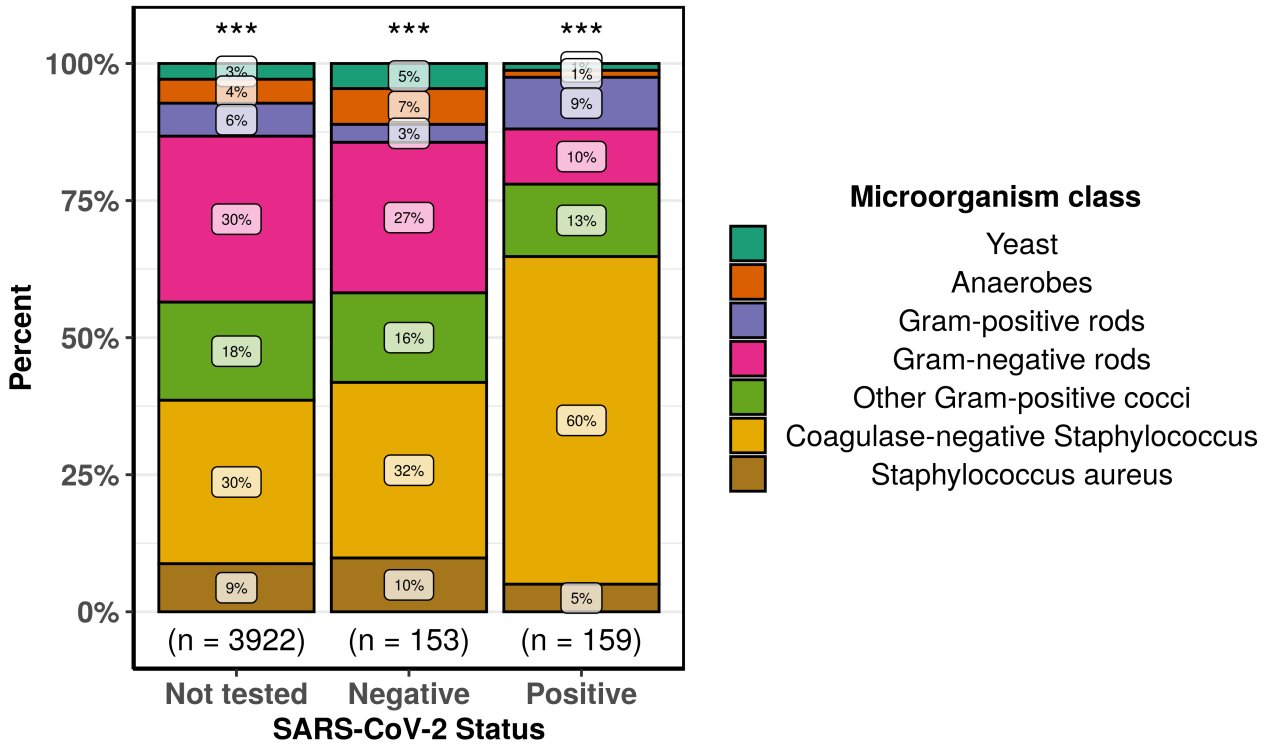

**Figure 3-B. Positive cultures per patient after excluding likely contaminants**

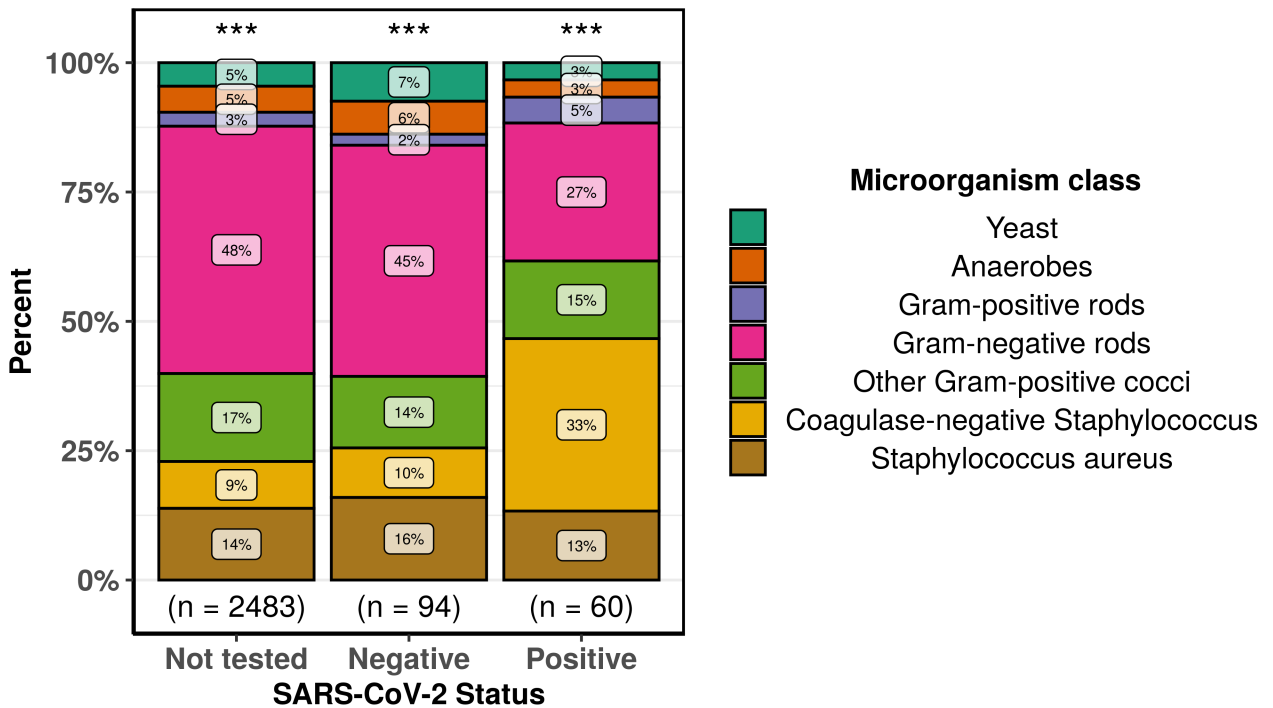

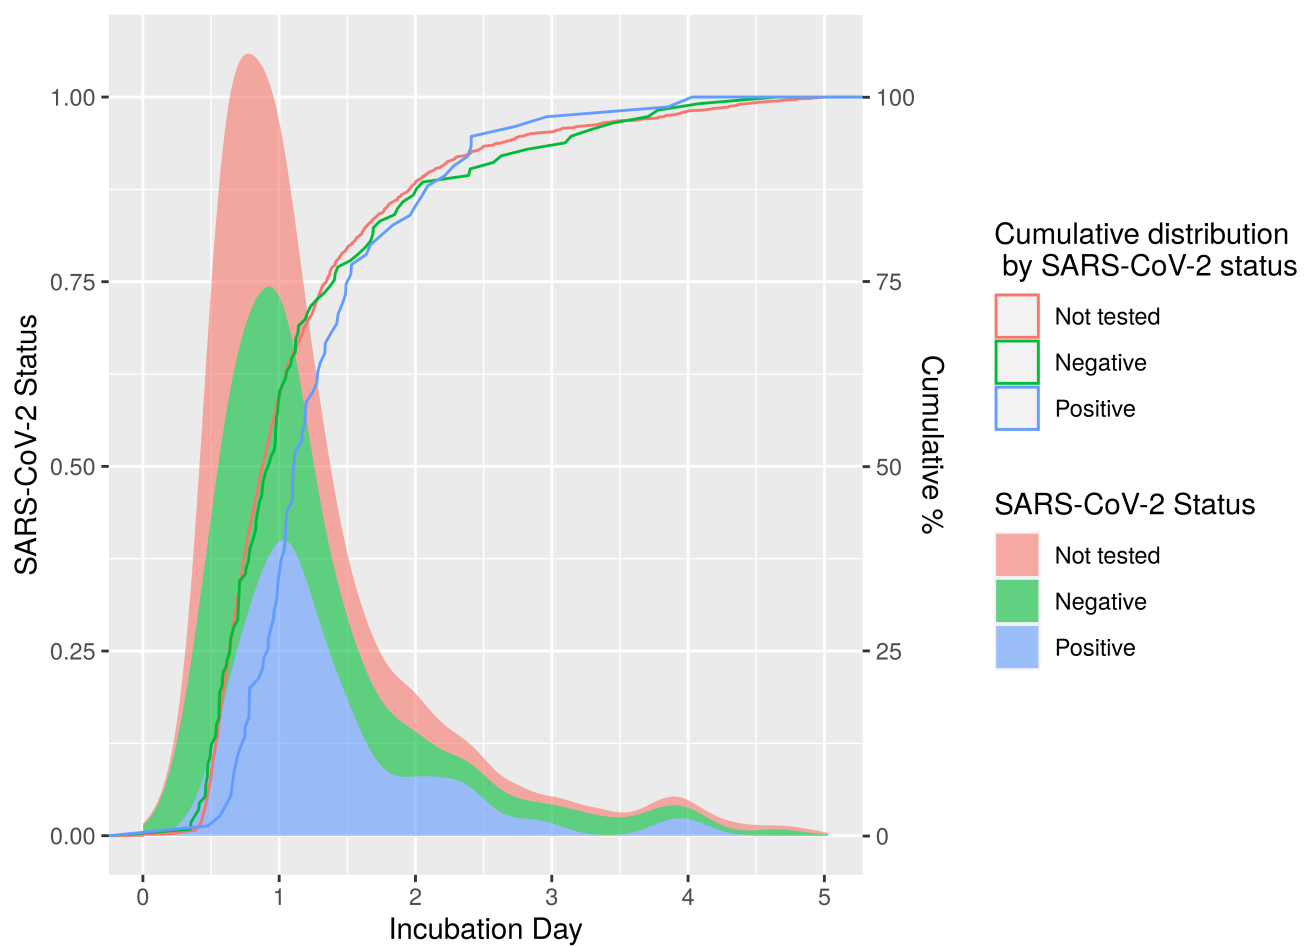

Source: https://medrxiv.org/content/medrxiv/early/2020/05/06/2020.05.05.20080044.full.pdf
